# Supplementary material for: Using Mid-Infrared Spectroscopy to Optimize Throughput and Costs of Soil Organic Carbon and Nitrogen Estimates: An Assessment in Grassland Soils
Source: MDPI journal article supplement (doi:10.3390/environments9120149), 2022-11-25
Supplement: s1 [file s1]

Archive with 1 entries (1 files):
- environments-2024953-supplementary.pdf
